# Supplementary material for: Sensitivity of KRAS-Mutant Colorectal Cancers to Combination Therapy That Cotargets MEK and CDK4/6
Source: Oxford University Press journal article supplement (doi:10.1158/1078-0432.ccr-15-0829), 2015-09-14
Supplement: 10780432ccr150829-sup-147769_1_supp_3123121_ntsyb5.docx [file 10780432ccr150829-sup-147769_1_supp_3123121_ntsyb5.docx]

| **Model** | **Gender** | **Age** | **Prior Chemotherapy** | **Location** | **Histopathology** | | | | **Mutational Status** | | | **Microsatellite Instability Status** |
| --- | --- | --- | --- | --- | --- | --- | --- | --- | --- | --- | --- | --- |
| **Type** | **TNM** | **Stage** | **Degree of Tumor Differentiation (Grade)** | **KRAS** | **BRAF** | **PIK3CA** |
| UM-CRM 11-721 | M | 45 | Unkn | Liver | MUC | Unkn | Unkn | Well | **G12D** | WT | WT | Unkn |
| UM-CRM 12-619 | M | 52 | Unkn | Liver | ADC | Unkn | Unkn | Moderate | WT | WT | WT | Unkn |
| UM-CRM 12-785 | F | 68 | Unkn | Liver | ADC | Unkn | Unkn | Moderate | WT | WT | **E545K** | Unkn |
| UM-CRM 12-1159 | M | 51 | Unkn | Liver | ADC | Unkn | Unkn | Moderate | WT | WT | **H1047R** | Unkn |
| UM-CRM 12-1324 | M | 54 | Unkn | Liver | ADC | Unkn | Unkn | Poor | **G12D** | WT | WT | Unkn |
| UM-CRM 13-156 | M | 51 | Unkn | Liver | ADC | Unkn | Unkn | Moderate | WT | WT | WT | Unkn |
| UM-CRM 13-180 | F | 72 | No | Left ovary | ADC | pT3N1aM1a | IVA | Moderate | **G12V** | WT | WT | MSS |
| UM-CRC 13-180 | F | 72 | No | Sigmoid colon | ADC | pT3N1aM1a | IVA | Moderate | **G12V** | WT | WT | MSS |
| UM-CRC 13-898 | M | 52 | No | Ascending colon | ADC | pT3N1b | IIIB | Moderate | **G13D** | WT | WT | MSS |
| UM-CRC 13-983 | F | 69 | No | Right/left colon | ADC | pT3N1c | IIIB | Moderate | WT | **V600E** | WT | **MSI** |
| UM-CRC 13-1153 | F | 44 | No | Sigmoid colon | ADC | pT3N1a | IIIB | Moderate | WT | WT | WT | MSS |
| UM-CRC 13-1333 | F | 53 | No | Sigmoid colon | ADC | pT3N1b | IIIB | Moderate | **G12D** | WT | **Q546L** | MSS |
| UM-CRC 13-1642 | M | 60 | No | Cecum | ADC | pT2N0 | I | Moderate | WT | WT | WT | **MSI** |
| UM-CRC 14-048 | M | 49 | No | Left colon | ADC | pT3N1b | IIIB | Moderate | WT | WT | WT | MSS |
| UM-CRC 14-136 | M | 54 | No | Right colon | MUC | pT3N0 | IIA | Moderate | **Q61H** | WT | **E542K** | MSS |
| UM-CRC 14-368 | M | 39 | No | Cecum | MUC | pT3N1c | IIIB | Moderate | **G13D** | WT | WT | **MSI** |
| UM-CRC 14-373 | M | 68 | No | Cecum | ADC | pT3N2a | IIIC | Moderate | WT | **V600E** | WT | MSS |
| UM-CRC 14-675 | M | 88 | No | Ascending colon | ADC | pT4bN1cM1b | IVB | Moderate | WT | WT | WT | MSS |
| Abbreviations: ADC = Adenocarcinoma; MSI = Microsatellite instable; MSS = Microsatellite stable; MUC = mucinous; Unkn = Unknown; WT = Wild type | | | | | | | | | | | | |

**Supplementary Table 1**
